# Supplementary material for: A first-principles study of the tuning effect of a Fe2O3 cluster on the dehydrogenation properties of a LiBH4 (001) surface
Source: Royal Society of Chemistry journal article supplement (doi:10.1039/c6dt01437b), 2016-01-01
Supplement: c6dt01437b1.pdf [file c6dt01437b1.pdf]

**Electronic Supplementary Information**

**for**

**A first-principle study of the tuning effect of Fe<sub>2</sub>O<sub>3</sub> cluster on the  
dehydrogenation properties of LiBH<sub>4</sub>(001) surface**

Chuan Liu<sup>a,b</sup>, Shiping Huang<sup>a,\*</sup>

<sup>a</sup> *State Key Laboratory of Organic-Inorganic Composites, Beijing University of  
Chemical Technology, Beijing 100029, China*

<sup>b</sup> *College of Chemistry and Materials Engineering, Anhui Science and Technology  
University, Fengyang, Anhui Province, 233100, China*

*E-mail: [huangsp@mail.buct.edu.cn](mailto:huangsp@mail.buct.edu.cn)*

---

| <b>Table of Contents</b> |                                                                                                                                                                                                                                | <b>Page no.</b> |
|--------------------------|--------------------------------------------------------------------------------------------------------------------------------------------------------------------------------------------------------------------------------|-----------------|
| <b>Section S1</b>        | Model and calculating considerations                                                                                                                                                                                           | S3              |
| <b>Section S2</b>        | Density of state of Fe <sub>2</sub> -B <sub>2</sub> H <sub>4</sub> <sup>-</sup> subject                                                                                                                                        | S3              |
| <b>Figure S1</b>         | The calculated total and partial density of states for Fe <sub>2</sub> O <sub>3</sub> cluster doped LiBH <sub>4</sub> (001) surface. The selected atoms are H6, B2, Li2, Fe2, and O3 atoms (labeled in Fig. 1b), respectively. | S4              |
| <b>Section S3</b>        | Hydrogen removal energy                                                                                                                                                                                                        | S4              |
| <b>Figure S2</b>         | Top view of the top two layers of the optimized structure of Fe <sub>2</sub> O <sub>3</sub> cluster doped LiBH <sub>4</sub> (001) surface.                                                                                     | S5              |
| <b>Table S1</b>          | The calculated hydrogen removal energy for these specific H atoms (labeled in Fig. S2).                                                                                                                                        | S5              |

---

## Section S1. Model and calculating considerations

The optimized bulk  $\text{LiBH}_4$  was used as a basis for constructing surface slab of  $\text{LiBH}_4$ . The surface model of  $\text{LiBH}_4$  (001) surface studied here was a  $2 \times 2 \times 1$  supercell slab consisting of six layers of  $\text{LiBH}_4$  formula units and had a total number of 144 atoms (24  $\text{LiBH}_4$  formula units).  $\text{Fe}_2\text{O}_3$  cluster was placed at different positions and directions on  $\text{LiBH}_4$  (001) surface to generate the optimized lowest-energy structures. The static total energy and electronic properties calculations were performed based on the optimized lowest-energy structures geometries. The method to calculate hydrogen removal energy is that we firstly remove one H atom out from the optimized  $\text{Fe}_2\text{O}_3$  cluster doped  $\text{LiBH}_4$  (001) surface and then optimize the H atom removed structures. The difference of total energy between the H atom removed and unremoved optimized structures is defined as hydrogen removal energy.

## Section S2. Density of state of $\text{Fe}_2\text{-B}_2\text{H}_4^-$ subject

The states of H6  $s$ , B2  $p$ , and Fe2  $d$  orbitals are all smaller than those of H1, B1, and Fe1 atoms, which demonstrates the hybridizations of H6  $s$ , B2  $p$ , and Fe2  $d$  orbitals is weaker than the hybridizations of H1  $s$ , B1  $p$ , and Fe1  $d$  orbitals. Thus, it is no doubt that the interaction between Fe2 and  $\text{B}_2\text{H}_4^-$  unit is weaker than the interaction between Fe1 and  $\text{B}_1\text{H}_4^-$  units. A new peak arise at -1.75 eV due to the coupling effect of the spin-unrestricted Fe  $d$  orbitals. However, the peaks at -1.75 eV in the partial DOSs of H6 and B2 atoms are smaller than those of H1 and B1 atoms, which also verifies that the interaction between Fe2 and  $\text{B}_2\text{H}_4^-$  unit is weaker than the interaction between Fe1 and  $\text{B}_1\text{H}_4^-$  units.

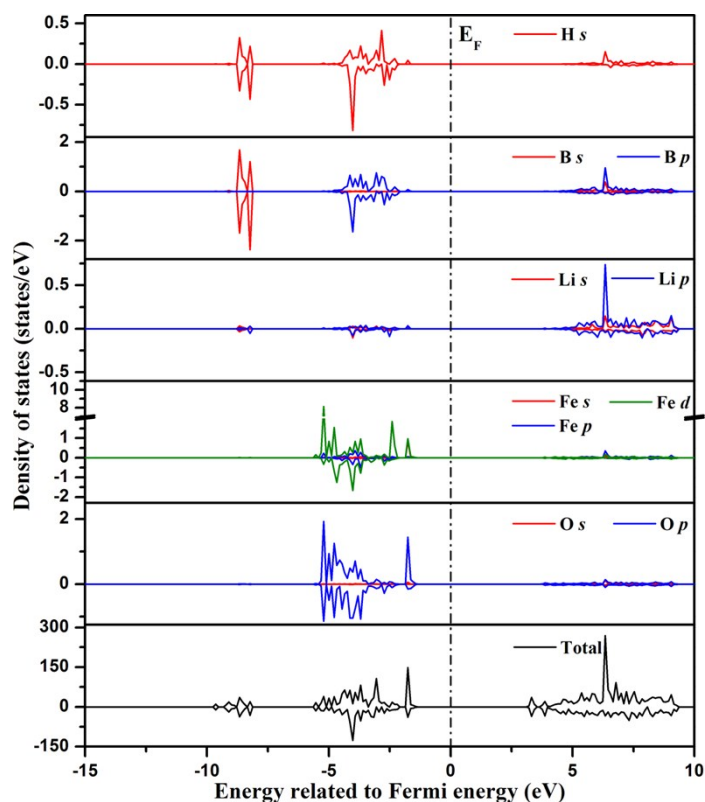

**Figure S1:** The calculated total and partial density of states for  $\text{Fe}_2\text{O}_3$  cluster doped  $\text{LiBH}_4$  (001) surface. The selected atoms are H6, B2, Li2, Fe2, and O3 atoms (labeled in Fig. 1b), respectively.

### Section S3. Hydrogen removal energy

Hydrogen removal energy is successfully used to explain the bond strength of X-H in the complex hydrogen storage materials. In order to study the doping of  $\text{Fe}_2\text{O}_3$  cluster on the bond strength of B-H bonds in  $\text{LiBH}_4$  (001) surface, we calculate hydrogen removal energies of these H atoms in the top two layer of  $\text{Fe}_2\text{O}_3$  cluster doped  $\text{LiBH}_4$  (001) surface. The studied H atoms are labeled in Fig. S2, and the calculated results are listed in Table S1.

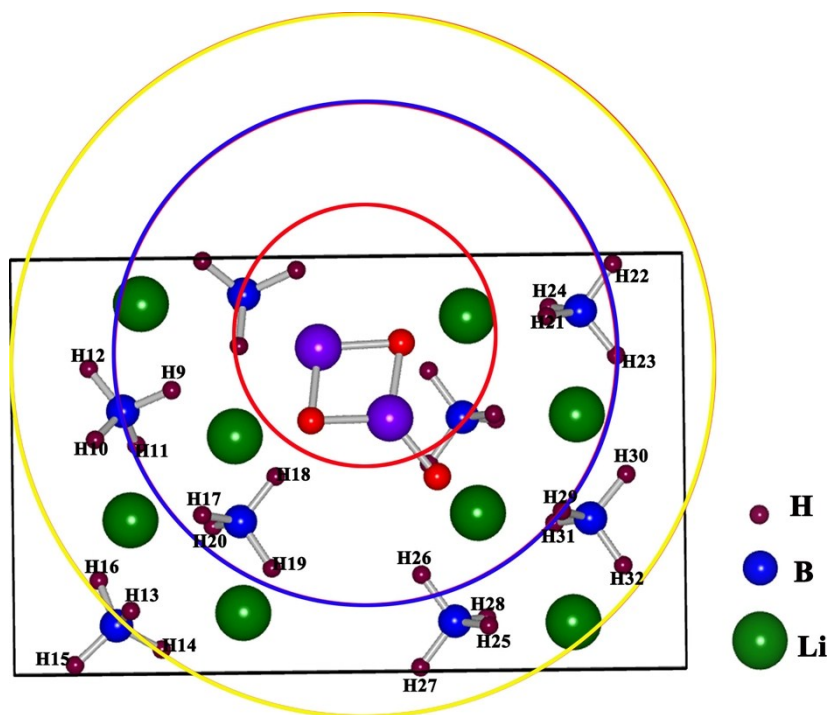

**Figure S2:** Top view of the top two layers of the optimized structure of  $\text{Fe}_2\text{O}_3$  cluster doped  $\text{LiBH}_4$  (001) surface.

**Table S1** The calculated hydrogen removal energy for these specific H atoms (labeled in Fig. S2).

| H atom | Removal energy (eV) | H atom | Removal energy (eV) | H atom | Removal energy (eV) |
|--------|---------------------|--------|---------------------|--------|---------------------|
| H9     | 0.05                | H17    | 0.65                | H25    | 0.24                |
| H10    | 0.05                | H18    | 0.15                | H26    | 0.25                |
| H11    | 2.33                | H19    | 0.11                | H27    | 0.32                |
| H12    | 0.07                | H20    | 0.13                | H28    | 0.16                |
| H13    | 2.27                | H21    | 0.24                | H29    | 0.09                |
| H14    | 2.25                | H22    | 0.16                | H30    | 0.17                |
| H15    | 2.27                | H23    | 0.28                | H31    | 0.38                |
| H16    | 2.25                | H24    | 0.15                | H32    | 0.05                |
